# Supplementary material for: Standardized Extract from Wastes of Edible Flowers and Snail Mucus Ameliorate Ultraviolet B-Induced Damage in Keratinocytes
Source: MDPI journal article supplement (doi:10.3390/ijms241210185), 2023-06-15
Supplement: s1 [file s1]

## Standardized Extract from Wastes of Edible Flowers and Snail Mucus Ameliorate Ultraviolet B-Induced Damage in Keratinocytes

Luca Vanella <sup>1,2,\*</sup>, Valeria Consoli <sup>1,2,†</sup>, Ilaria Burò <sup>1</sup>, Maria Gulisano <sup>1</sup>, Manuela Stefania Giglio <sup>1</sup>, Ludovica Maugeri <sup>1</sup>, Salvatore Petralia <sup>1</sup>, Angela Castellano <sup>3</sup> and Valeria Sorrenti <sup>1,2</sup>

<sup>1</sup> Department of Drug and Health Sciences, University of Catania, 95125 Catania, Italy; valeria\_consoli@yahoo.it (V.C.); ilariaburo95@gmail.com (I.B.); maria.gulisano@hotmail.it (M.G.); manuela1189glg@gmail.com (M.S.G.); maugeri ludovica@gmail.com (L.M.); salvatore.petralia@unict.it (S.P.); sorrenti@unict.it (V.S.)

<sup>2</sup> CERNUT–Research Centre for Nutraceuticals and Health Products, University of Catania, 95125 Catania, Italy

<sup>3</sup> Mediterranean Nutraceutical Extracts (Medinutrex), Via Vincenzo Giuffrida 202, 95128 Catania, Italy; info@medinutrex.com

\* Correspondence: lvanella@unict.it

† These authors contributed equally to this work.

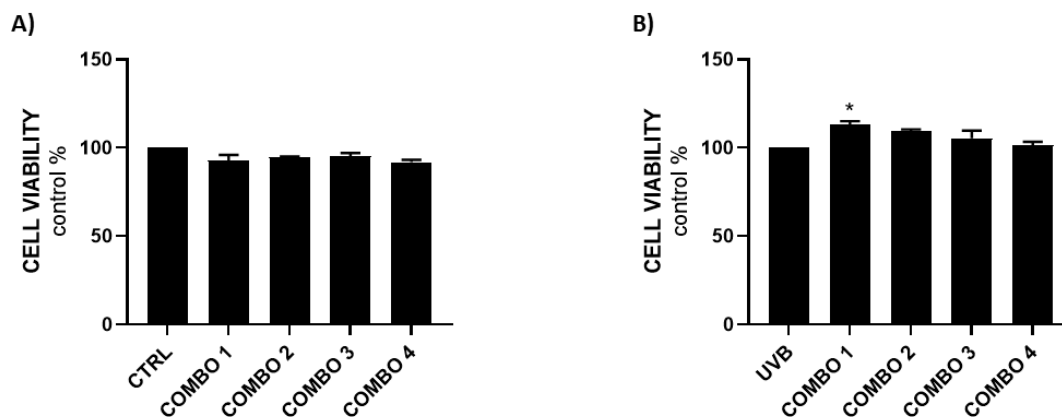

**Figure S1.** Assessment of cell viability after combination treatment (COMBO 1 : SEM 5 ug/ml + EFE 0.25 mg/ml ; COMBO 2: SEM 5 ug/ml + EFE 0.5 mg/ml; COMBO 3: SEM 10 ug/ml + EFE 0.25 mg/ml; COMBO 4: SEM 10 ug/ml + EFE 0.5 mg/ml) in cells exposed (B) or not (A) to UVB radiation (100 sec). \*  $p < 0.05$ .

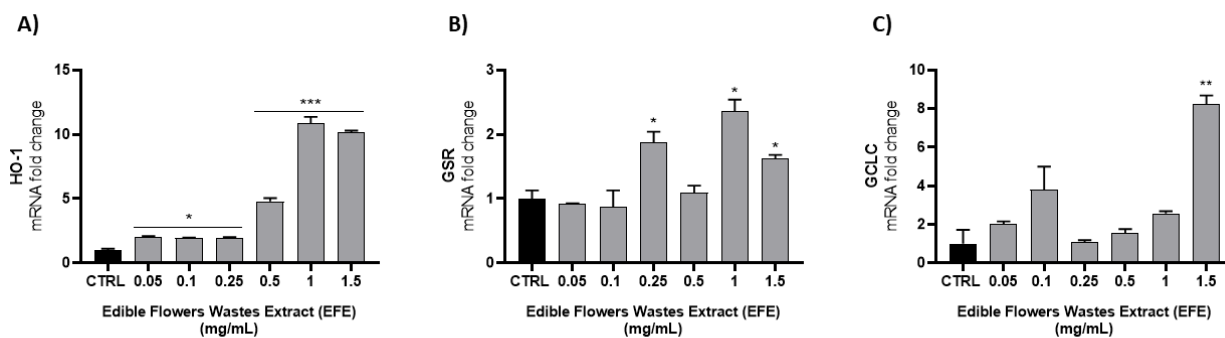

**Figure S2.** (A-C) Evaluation of EFE's effect on antioxidant genes' expression following 24h treatment. Results are expressed as mean  $\pm$  SEM. (\*  $p < 0.05$ ; \*\*  $p < 0.005$ ; \*\*\*  $p < 0.0005$  vs CTRL)

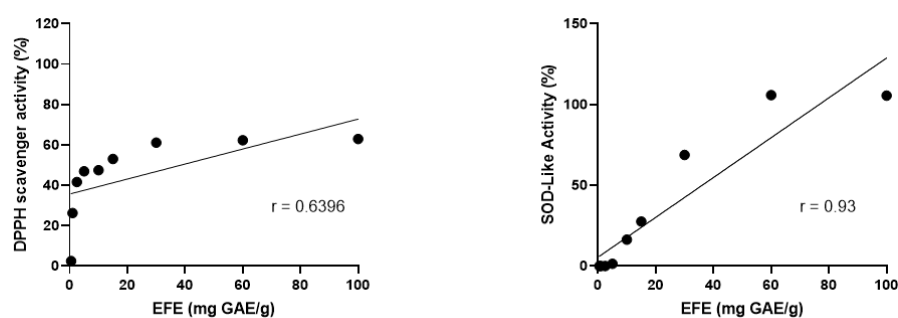

**Figure S3.** Pearson correlation scatter plot of relationship between antioxidant activity and total polyphenols content of EFE.
